# Supplementary material for: Lead isotope trends and sources in the atmosphere at the artificial wetland
Source: PeerJ. 2019 Oct 16;7:e7851. doi: 10.7717/peerj.7851 (PMC6800525; doi:10.7717/peerj.7851)
Supplement: Supplemental Information 1 [file peerj-07-7851-s001.xlsx]

## Sheet: TSP concentration
Season	Date	TSP(ug⁄m^3 )
Spring	4.21	0.233333
Spring	4.21	0.2125
Spring	4.21	0.0791667
Spring	4.21	0.0916667
Spring	4.21	0.233333
Spring	4.21	0.116667
Spring	4.22	0.179167
Spring	4.22	0.116667
Spring	4.22	0.0916667
Spring	4.22	0.2625
Spring	4.22	0.254167
Spring	4.22	0.1875
Summer	7.28	0.0704167
Summer	7.28	0.123333
Summer	7.28	0.0169444
Summer	7.28	0.117361
Summer	7.28	0.0565278
Summer	7.28	0.0147222
Summer	7.29	0.114167
Summer	7.29	0.0536111
Summer	7.29	0.0766667
Summer	7.29	0.115833
Summer	7.29	0.0375694
Summer	7.29	0.0436111
Summer	7.3	0.02
Summer	7.3	0.0626389
Summer	7.3	0.0241667
Summer	7.3	0.154306
Autumn	11.4	0.224583
Autumn	11.4	0.0479167
Autumn	11.4	0.0129167
Autumn	11.4	0.104167
Autumn	11.4	0.0833333
Autumn	11.4	0.133333
Winter	11.26	0.25
Winter	11.26	0.354167
Winter	11.26	0.375
Winter	11.26	0.375
Winter	11.26	0.4375
Winter	11.26	0.229167
Winter	11.25	0.458333
Winter	11.25	0.166667
Winter	11.25	0.145833
Winter	11.25	0.25
Winter	11.25	0.25
Winter	11.25	0.270833
Winter	11.27	0.145833
Winter	11.27	0.229167
Winter	11.27	0.0833333
Winter	11.27	0.0625
Winter	11.27	0.166667
Winter	11.27	0.145833

## Sheet: lead concentration and istope
				Concentration					Content
				27 Al	204 Pb	206 Pb	207 Pb	208 Pb	27 Al	204 Pb	206 Pb	207 Pb	208 Pb
Season	Date	Sample weight/g	Constant volume/ml	[ ppm ]	[ ppb ]	[ ppb ]	[ ppb ]	[ ppb ]	mg/kg	mg/kg	mg/kg	mg/kg	mg/kg
Autumn	2016 10.24 A	0.239	50	26.8921	9.26319	9.03002	8.88368	8.94818	25.1421	0.663846	0.615066	0.584452	0.597946
Autumn	2016 10.25 A	0.1647	50	26.5068	43.4407	41.6508	42.3556	42.1094	24.7568	11.339	10.7956	11.0096	10.9349
Winter	2016 11.25 B	0.232	50	23.368	33.6522	32.518	32.9922	32.823	21.618	5.94013	5.69569	5.79789	5.76142
Winter	2016 11.25 C	0.1636	50	25.343	25.786	24.9197	25.3879	25.1647	23.593	6.01957	5.7548	5.89789	5.82966
Winter	2016 11.26 A	0.158	50	15.5522	32.5951	31.2849	31.8826	31.5717	13.8022	8.38768	7.97306	8.16221	8.06384
Winter	2016 11.26 B	0.1697	50	26.8366	53.2079	51.4331	52.4018	51.9945	25.0866	13.8827	13.3598	13.6452	13.5252
Winter	2016 11.26 C	0.1776	50	16.1267	31.8187	30.8019	31.4125	31.1735	14.3767	7.24343	6.95718	7.12908	7.06181
Winter	2016 11.27 A	0.1685	50	24.0671	10.4899	10.3937	10.3041	10.3183	22.3171	1.3056	1.27705	1.25047	1.25468
Winter	2016 11.27 B	0.1569	50	10.8109	9.10112	8.98678	9.10399	9.04498	9.0609	0.959566	0.923131	0.960481	0.941675
Winter	2016 11.27 C	0.1635	50	15.1363	8.54769	8.84823	8.52241	8.58825	13.3863	0.751587	0.843496	0.743855	0.76399
Autumn	2016 11.4 A	0.1623	50	12.3515	39.1505	37.9003	38.9352	38.435	10.6015	10.185	9.79983	10.1187	9.96457
Autumn	2016 11.4 B	0.1637	50	13.9095	35.0004	34.2104	34.8096	34.5162	12.1595	8.83029	8.58901	8.77203	8.6824
Autumn	2016 11.4 C	0.1504	50	12.627	19.0481	18.4788	18.9515	18.7234	10.877	4.30787	4.11861	4.27577	4.19992
Spring	2017 4.21 A	0.2569	50	19.9849	11.4829	11.2915	11.2499	11.2765	18.2349	1.04962	1.01236	1.00425	1.00944
Spring	2017 4.21 B	0.2464	50	20.9042	10.4913	10.3587	10.2872	10.3072	19.1542	0.893129	0.866206	0.851713	0.855763
Spring	2017 4.22 A	0.2405	50	15.8482	13.164	12.8365	12.8971	12.8418	14.0982	1.47069	1.40259	1.41519	1.4037
Spring	2017 4.22 B	0.2503	50	21.8822	17.7318	17.3757	17.7251	17.5486	20.1322	2.32556	2.25444	2.32422	2.28897
Summer	2017 7.28 A	0.2424	50	13.8569	12.9946	12.8391	12.9498	12.8249	12.1069	1.42421	1.39213	1.41498	1.38922
Summer	2017 7.28 C	0.2327	50	20.0401	10.798	10.858	10.7838	10.7786	18.2901	1.01161	1.02449	1.00855	1.00743
Summer	2017 7.29 B	0.2332	50	27.5367	15.0599	14.7329	14.7378	14.7202	25.7867	1.92322	1.85311	1.85415	1.85039
Summer	2017 7.29 C	0.26	50	57.0738	11.9663	12.6157	11.774	12.1442	55.3238	1.13007	1.25493	1.09309	1.16427
Summer	2017 7.30 B	0.1633	50	56.6223	12.6119	13.3176	12.6378	12.9075	54.8723	1.99691	2.21299	2.00485	2.08742
Summer	2017 7.30 C	0.1697	50	107.426	14.7955	16.1239	14.777	15.3857	105.676	2.56497	2.95635	2.55952	2.73887
